# Supplementary material for: Palladium and platinum complexes of tellurium-containing imidodiphosphinate ligands: nucleophilic attack of Li[(PiPr2)(TePiPr2)N] on coordinated 1,5-cyclooctadiene
Source: Royal Society of Chemistry journal article supplement (doi:10.1039/b911490d), 2009-01-01

**Supporting Information for:**

**Palladium and platinum complexes of tellurium-containing imidodiphosphate ligands: nucleophilic attack of**

**Li[(P<sup>i</sup>Pr<sub>2</sub>)(TeP<sup>i</sup>Pr<sub>2</sub>)N] on coordinated 1,5-cyclooctadiene**

**Stuart D. Robertson, Jamie S. Ritch and Tristram Chivers\***

*Department of Chemistry, University of Calgary, 2500 University Drive NW, Calgary, Alberta, Canada, T2N 1N4.*

*E-mail: chivers@ucalgary.ca; Fax: +1 403 289 9488; Tel: +1 403 220 5741*

**Contents:**

Multinuclear NMR Spectra of Complexes **8** and **9**

**<sup>31</sup>P NMR Spectrum (*d*<sub>8</sub>-THF) of 9**

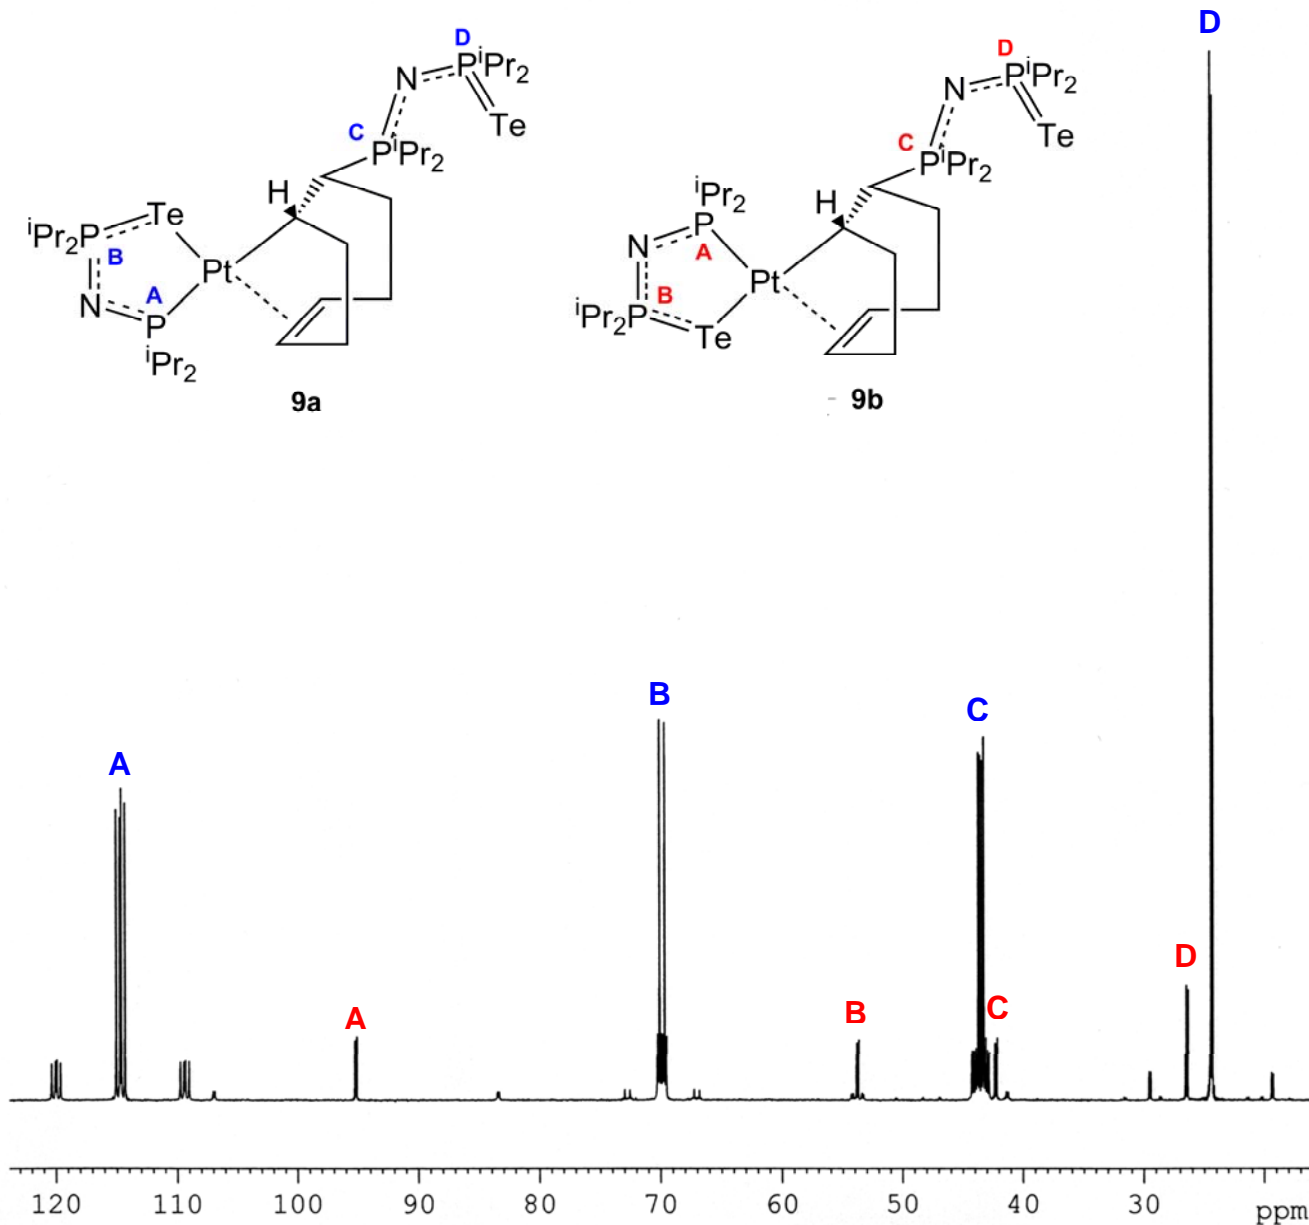

Current Data Parameters  
 NAME 90401jrl  
 EXPNO 2  
 PROCNO 1

F2 - Acquisition Parameters  
 Date\_ 20090401  
 Time\_ 13.01  
 INSTRUM spect  
 PROBHD 5 mm BBO BB-1H  
 PULPROG zgdc30  
 TD 32768  
 SOLVENT D2O  
 NS 326  
 DS 0  
 SWH 48661.801 Hz  
 FIDRES 1.485040 Hz  
 AQ 0.3367412 sec  
 RG 4597.6  
 DW 10.275 usec  
 DE 14.68 usec  
 TE 296.8 K  
 D1 1.0000000 sec  
 d11 0.03000000 sec  
 MCREST 0.00000000 sec  
 MCWRK 0.01500000 sec

===== CHANNEL f1 =====  
 NUC1 31P  
 P1 6.60 usec  
 PL1 -2.00 dB  
 SFO1 161.7102994 MHz

===== CHANNEL f2 =====  
 CPDPRG2 waltz16  
 NUC2 1H  
 PCPD2 80.00 usec  
 PL2 120.00 dB  
 PL12 18.00 dB  
 SFO2 399.4572000 MHz

F2 - Processing parameters  
 SI 32768  
 SF 161.7022045 MHz  
 WDW EM  
 SSB 0  
 LB 1.00 Hz  
 GB 0  
 PC 1.40

1D NMR plot parameters  
 CX 20.00 cm  
 CY 11.97 cm  
 F1P 130.000 ppm  
 F1 21021.29 Hz  
 F2P 10.000 ppm  
 F2 1617.02 Hz  
 PPMCM 6.00000 ppm/cm  
 HZCM 970.21320 Hz/cm

### Selected Expansions of the $^{31}\text{P}$ NMR Spectrum ( $d_8$ -THF) of **9**

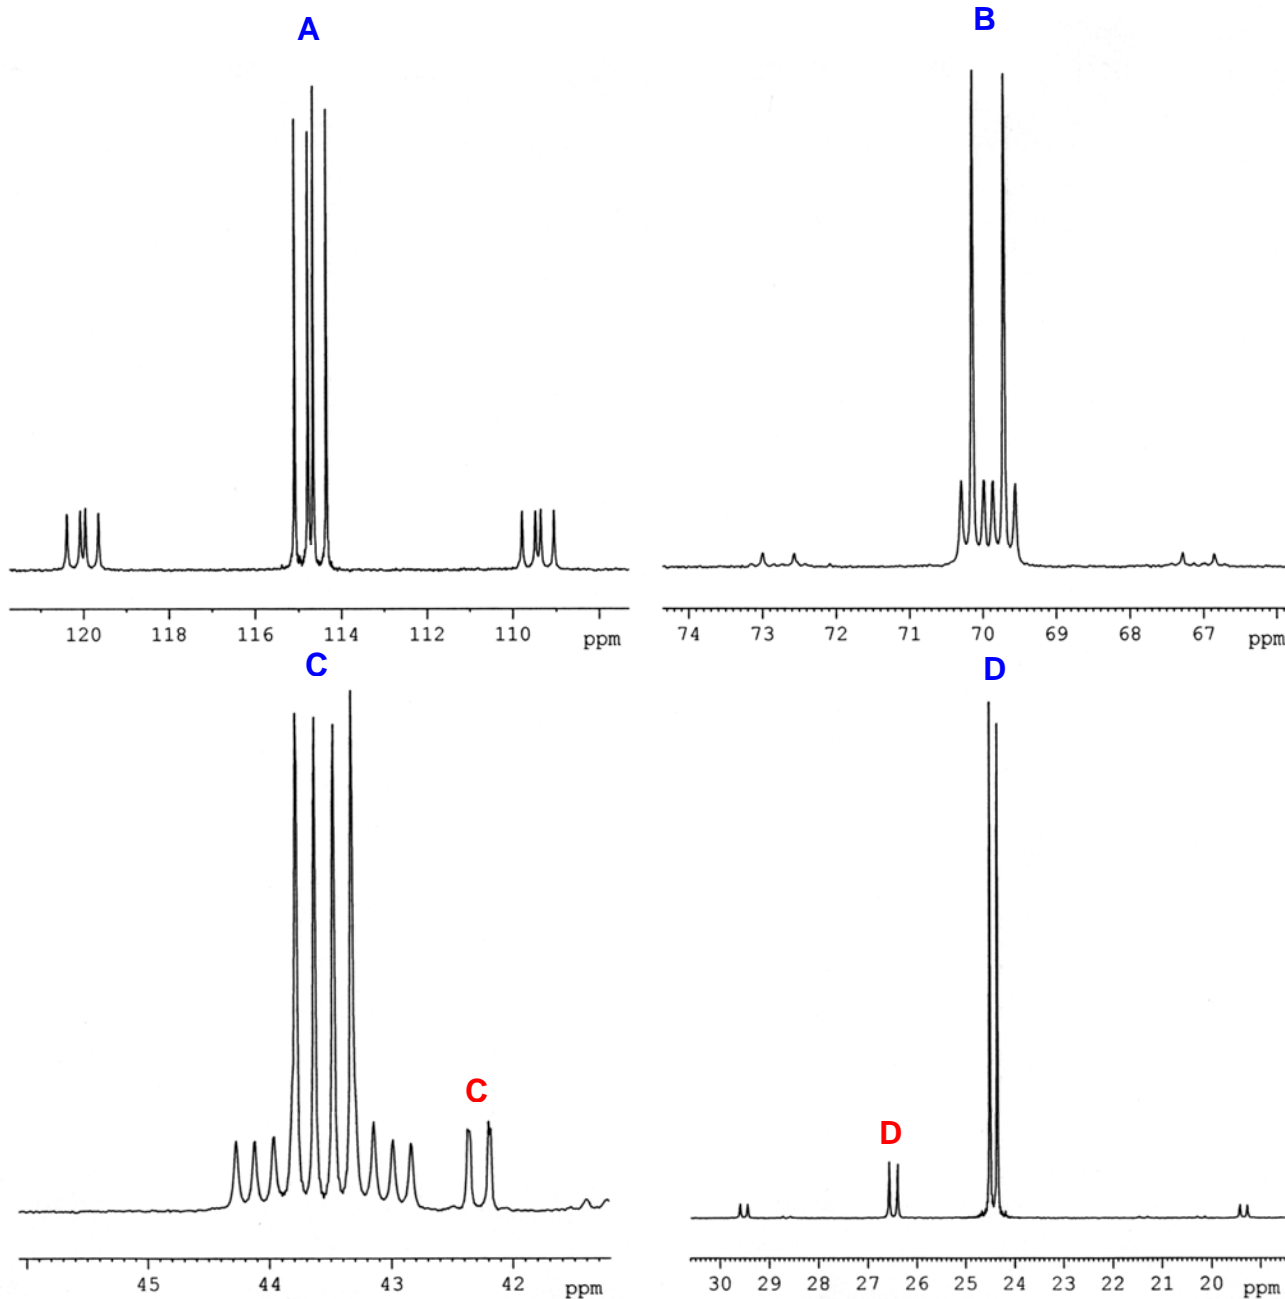

#### Current Data Parameters

NAME 90401jrl  
EXPNO 2  
PROCNO 1

#### F2 - Acquisition Parameters

Date\_ 20090401  
Time\_ 13.01  
INSTRUM spect  
PROBHD 5 mm BBO BB-1H  
PULPROG zgdc30  
TD 32768  
SOLVENT D2O  
NS 326  
DS 0  
SWH 48661.801 Hz  
FIDRES 1.485040 Hz  
AQ 0.3367412 sec  
RG 4597.6  
DW 10.275 usec  
DE 14.68 usec  
TE 296.8 K  
D1 1.00000000 sec  
d11 0.03000000 sec  
MCREST 0.00000000 sec  
MCWRK 0.01500000 sec

#### ==== CHANNEL f1 =====

NUC1 31P  
P1 6.60 usec  
PL1 -2.00 dB  
SFO1 161.7102994 MHz

#### ==== CHANNEL f2 =====

CPDPRG2 waltz16  
NUC2 1H  
PCPD2 80.00 usec  
PL2 120.00 dB  
PL12 18.00 dB  
SFO2 399.4572000 MHz

#### F2 - Processing parameters

SI 32768  
SF 161.7022045 MHz  
WDW EM  
SSB 0  
LB 1.00 Hz  
GB 0  
PC 1.40

#### 1D NMR plot parameters

CX 20.00 cm  
F1P 130.000 ppm  
F1 21021.29 Hz  
F2P 10.000 ppm  
F2 1617.02 Hz  
PPMCM 6.00000 ppm/cm  
HZCM 970.21320 Hz/cm

**<sup>125</sup>Te NMR Spectrum (*d*<sub>8</sub>-THF) of 9 (first window)**

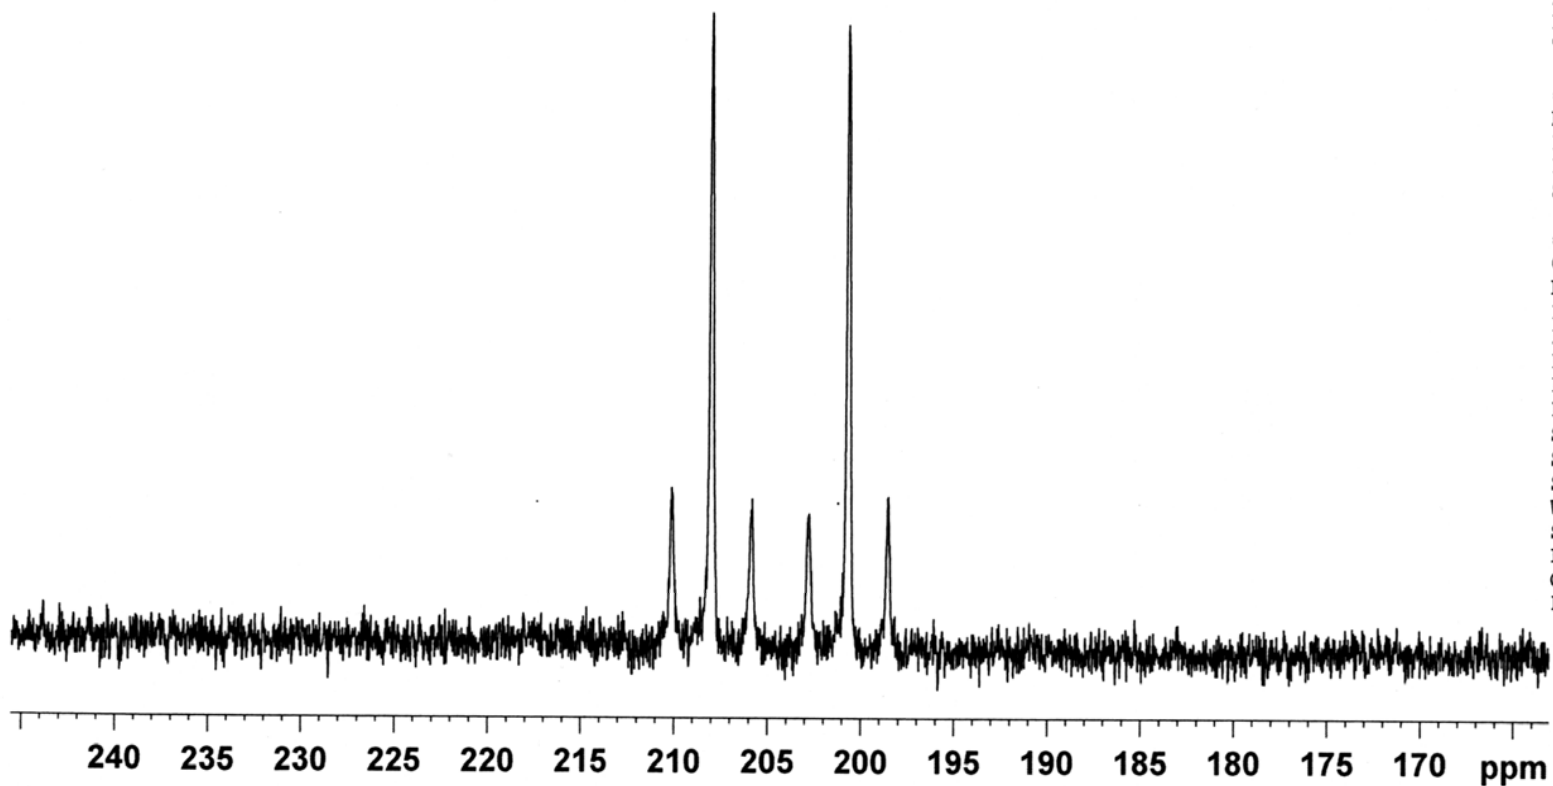

```
NAME          90313jrl
EXPNO         2
PROCNO       1
Date_        20090313
Time         20.14
INSTRUM      spect
PROBHD      5 mm PABBO BB-
PULPROG     zgdc30
TD          32768
SOLVENT      THF
NS          36053
DS           4
SWH         75187.969 Hz
FIDRES      2.294555 Hz
AQ          0.2179572 sec
RG          32768
DW          6.650 usec
DE          50.00 usec
TE          298.5 K
D1          1.00000000 sec
D11         0.03000000 sec
TD0         1
```

```
===== CHANNEL f1 =====
NUC1          125Te
P1            5.50 usec
PL1           3.00 dB
SFO1          126.2748044 MHz
```

```
===== CHANNEL f2 =====
CPDPRG2      waltz16
NUC2          1H
PCPD2        80.00 usec
PL2           0.00 dB
PL12          15.00 dB
PL2W          15.07131863 W
PL12W         0.47659695 W
SFO2          400.1816007 MHz
SI            32768
SF            126.2557224 MHz
WDW           EM
SSB           0
LB            1.00 Hz
GB            0
PC            1.40
```

**<sup>125</sup>Te NMR Spectrum (*d*<sub>8</sub>-THF) of 9 (second window)**

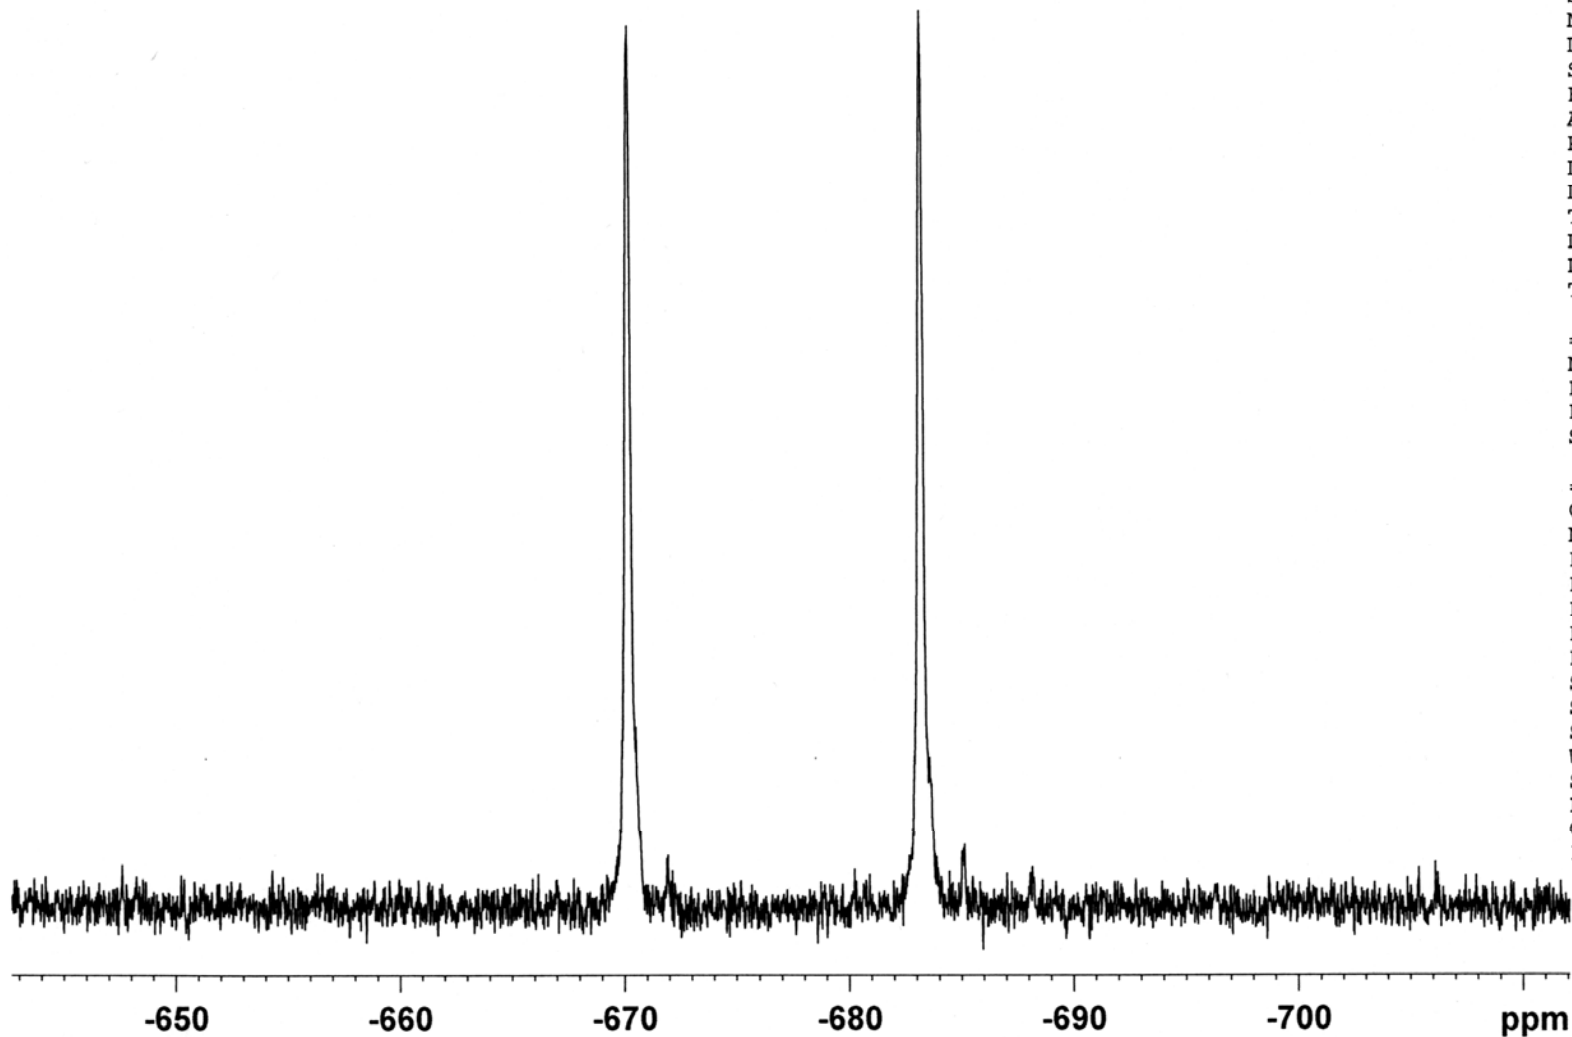

NAME 90316jr2  
EXPNO 3  
PROCNO 1  
Date\_ 20090316  
Time\_ 19.58  
INSTRUM spect  
PROBHD 5 mm PABBO BB-  
PULPROG zgdc30  
TD 32768  
SOLVENT THF  
NS 36414  
DS 4  
SWH 75187.969 Hz  
FIDRES 2.294555 Hz  
AQ 0.2179572 sec  
RG 32768  
DW 6.650 usec  
DE 50.00 usec  
TE 298.2 K  
D1 1.00000000 sec  
D11 0.03000000 sec  
TD0 1

==== CHANNEL f1 =====  
NUC1 125Te  
P1 5.50 usec  
PL1 3.00 dB  
SFO1 126.2003134 MHz

==== CHANNEL f2 =====  
CPDPRG2 waltz16  
NUC2 1H  
PCPD2 80.00 usec  
PL2 0.00 dB  
PL12 15.00 dB  
PL2W 15.07131863 W  
PL12W 0.47659695 W  
SFO2 400.1816007 MHz  
SI 32768  
SF 126.2557224 MHz  
WDW EM  
SSB 0  
LB 1.00 Hz  
GB 0  
PC 1.40

**$^{195}\text{Pt}$  NMR Spectrum ( $d_8$ -THF) of 9**

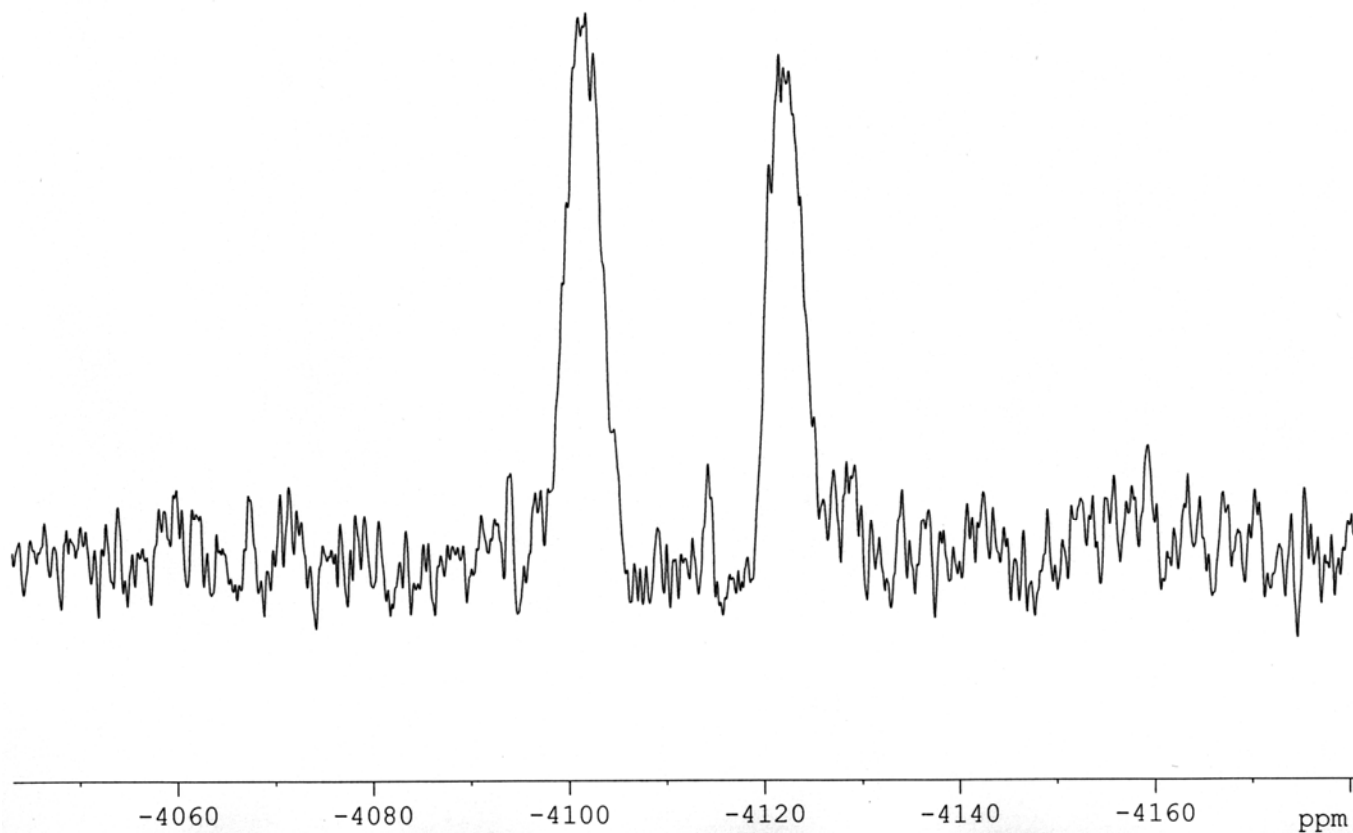

Current Data Parameters  
NAME 81003jrl  
EXPNO 15  
PROCNO 1

F2 - Acquisition Parameters  
Date 20081005  
Time 4.10  
INSTRUM spect  
PROBHD 5 mm BBO BB-1H  
PULPROG zg30  
TD 32768  
SOLVENT THF  
NS 17000  
DS 2  
SWH 70422.539 Hz  
FIDRES 2.149125 Hz  
AQ 0.2327028 sec  
RG 32768  
DW 7.100 usec  
DE 50.00 usec  
TE 298.0 K  
D1 1.00000000 sec  
MCREST 0.00000000 sec  
MCWRK 0.01500000 sec

===== CHANNEL f1 =====  
NUC1 195Pt  
P1 9.30 usec  
PL1 -2.00 dB  
SFO1 85.4920237 MHz

F2 - Processing parameters  
SI 32768  
SF 85.8710429 MHz  
WDW EM  
SSB 0  
LB 30.00 Hz  
GB 0  
PC 4.00

1D NMR plot parameters  
CX 20.00 cm  
F1P -599.724 ppm  
F1 -51498.96 Hz  
F2P -1800.275 ppm  
F2 -154591.52 Hz  
PPMCM 60.02755 ppm/  
HZCM 5154.62793 Hz/c

**<sup>13</sup>C NMR Spectrum (*d*<sub>8</sub>-THF) of 9**

**Species present:**

9

<sup>n</sup>hexane

*d*<sub>8</sub>-THF

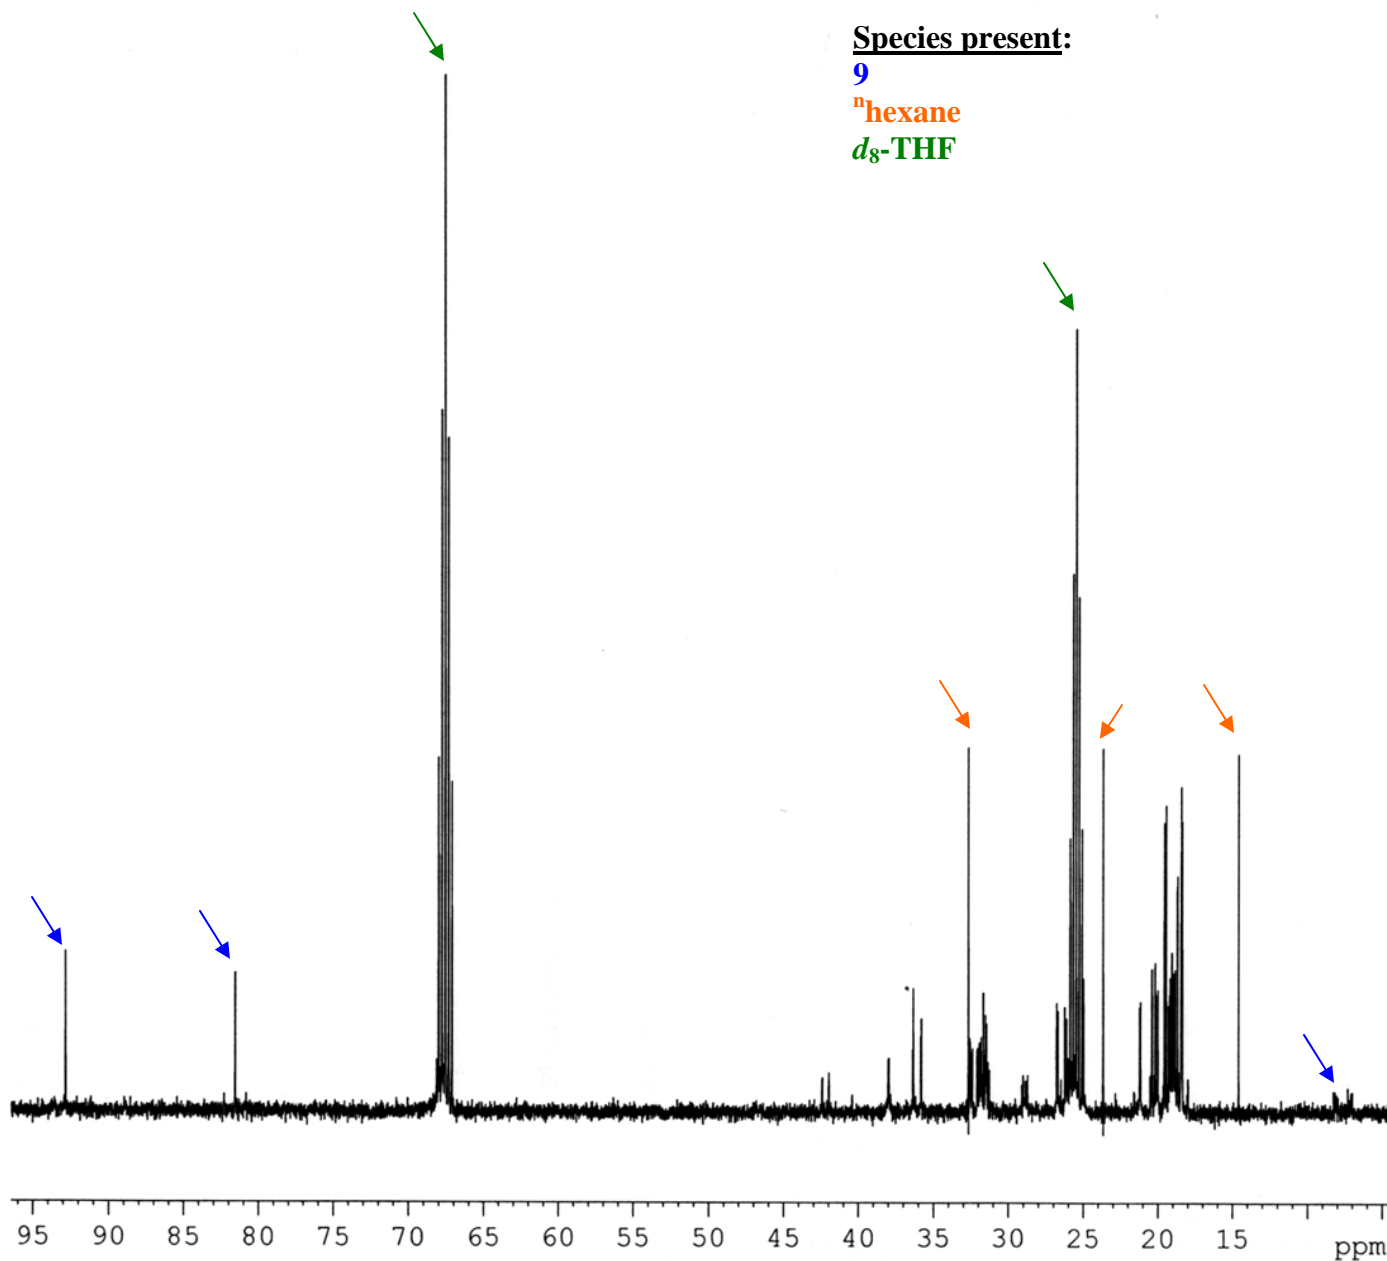

Current Data Parameters  
NAME 90401jr1  
EXPNO 3  
PROCNO 1

F2 - Acquisition Parameters  
Date\_ 20090401  
Time\_ 13.31  
INSTRUM spect  
PROBHD 5 mm BBO BB-1H  
PULPROG zgdc30  
TD 32768  
SOLVENT CDC13  
NS 2150  
DS 2  
SWH 27662.518 Hz  
FIDRES 0.844193 Hz  
AQ 0.5923316 sec  
RG 32768  
DW 18.075 usec  
DE 50.00 usec  
TE 297.1 K  
D1 2.00000000 sec  
d11 0.03000000 sec  
MCREST 0.00000000 sec  
MCWRK 0.01500000 sec

==== CHANNEL f1 =====  
NUC1 13C  
P1 8.50 usec  
PL1 -2.00 dB  
SFO1 100.4530843 MHz

==== CHANNEL f2 =====  
CPDPRG2 waltz16  
NUC2 1H  
PCPD2 80.00 usec  
PL2 120.00 dB  
PL12 17.80 dB  
SFO2 399.4572000 MHz

F2 - Processing parameters  
SI 32768  
SF 100.4429251 MHz  
WDW EM  
SSB 0  
LB 0.20 Hz  
GB 0  
PC 4.00

1D NMR plot parameters  
CX 20.00 cm  
F1P 100.000 ppm  
F1 10044.29 Hz  
F2P 0.000 ppm  
F2 0.00 Hz  
PPMCM 5.00000 ppm/cm  
HZCM 502.21463 Hz/cm

**DEPT-90 NMR Spectrum ( $d_8$ -THF) of 9**

**Species present:**

9a

9b

$d_7$ -THF

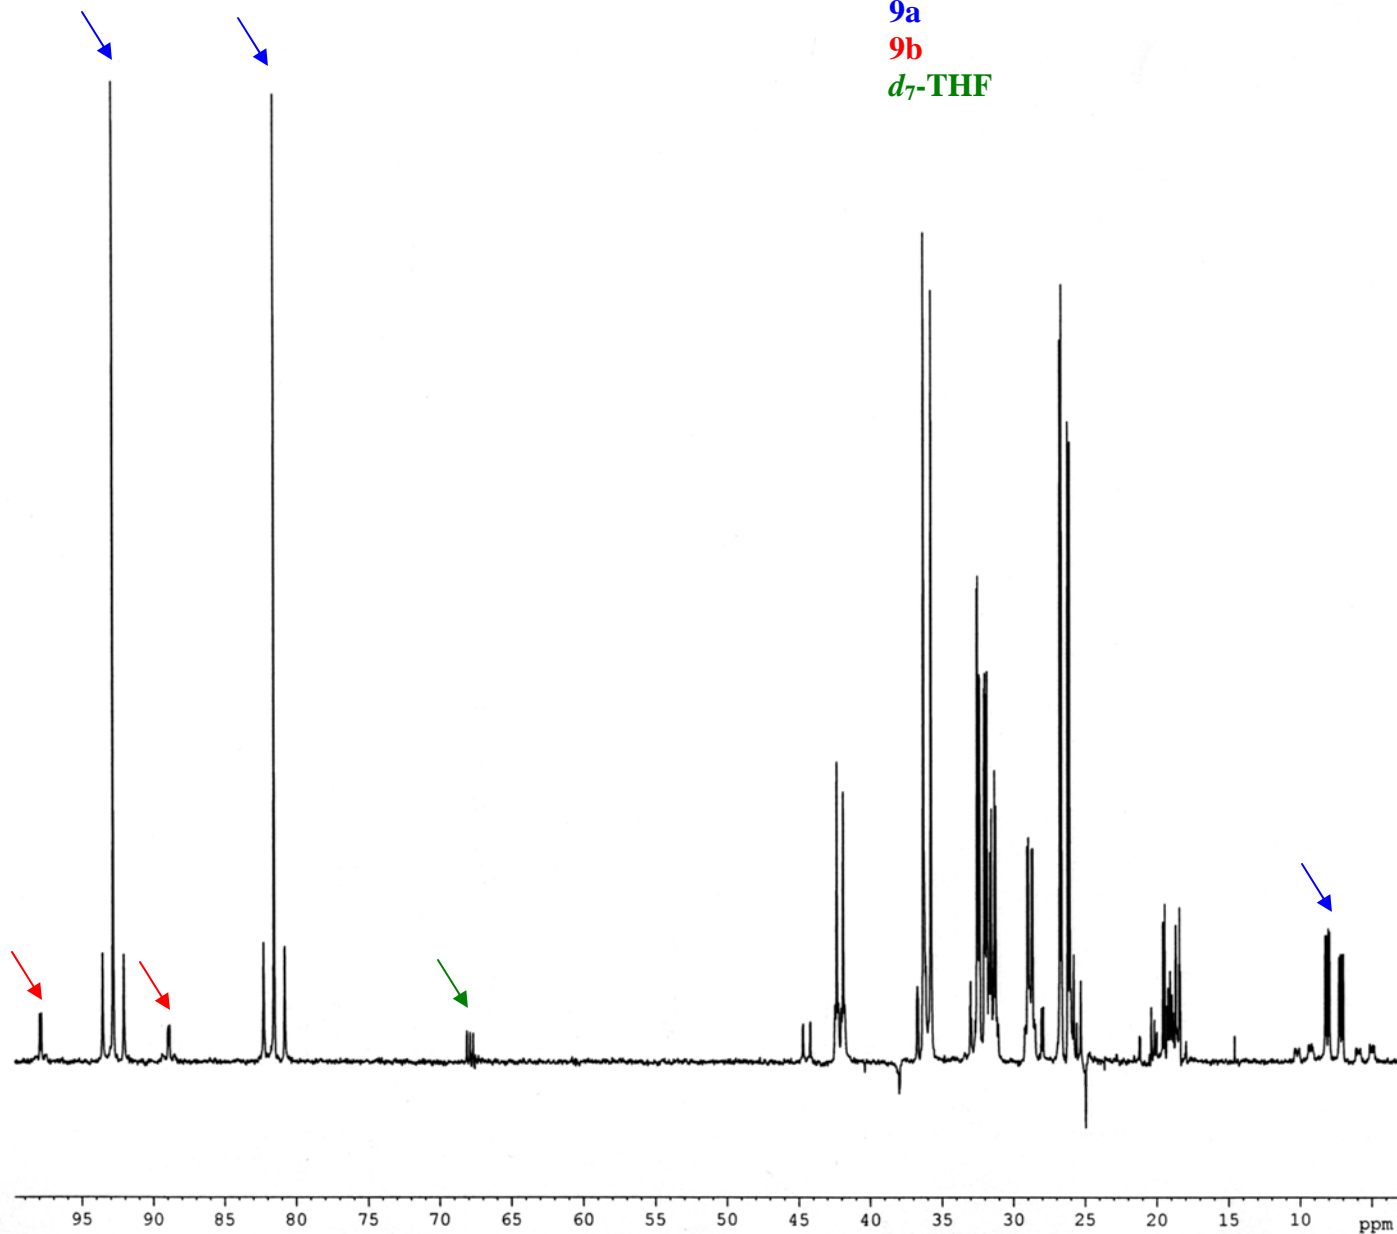

Current Data Parameters  
NAME 90401jr1  
EXPNO 4  
PROCNO 1

F2 - Acquisition Parameters  
Date\_ 20090401  
Time\_ 15.10  
INSTRUM spect  
PROBHD 5 mm BBO BB-1H  
PULPROG dept90  
TD 32768  
SOLVENT CDCl3  
NS 37411  
DS 0  
SWH 25125.629 Hz  
FIDRES 0.766773 Hz  
AQ 0.6521332 sec  
RG 32768  
DW 19.900 usec  
DE 29.00 usec  
TE 296.9 K  
CNST2 145.0000000  
D1 1.00000000 sec  
d2 0.00344828 sec  
d12 0.00002000 sec  
DELTA 0.00000993 sec  
MCREST 0.00000000 sec  
MCWRK 0.01500000 sec

==== CHANNEL f1 =====  
NUC1 13C  
P1 7.80 usec  
p2 15.60 usec  
PL1 -2.00 dB  
SFO1 100.4546033 MHz

==== CHANNEL f2 =====  
CPDPRG2 waltz16  
NUC2 1H  
P3 9.50 usec  
p4 19.00 usec  
PCPD2 80.00 usec  
PL2 -2.00 dB  
PL12 18.00 dB  
SFO2 399.4572000 MHz

F2 - Processing parameters  
SI 32768  
SF 100.4429261 MHz  
WDW EM  
SSB 0  
LB 2.00 Hz  
GB 0  
PC 1.40

1D NMR plot parameters  
CX 20.00 cm  
F1P 15.822 ppm  
F1 1589.17 Hz  
F2P 1.877 ppm  
F2 188.53 Hz  
PPMCM 0.69723 ppm/c  
HZCM 70.03214 Hz/cm



**Selected Expansions of the DEPT-90 NMR Spectrum ( $d_8$ -THF) of 9a (asterisks denote 9b)**

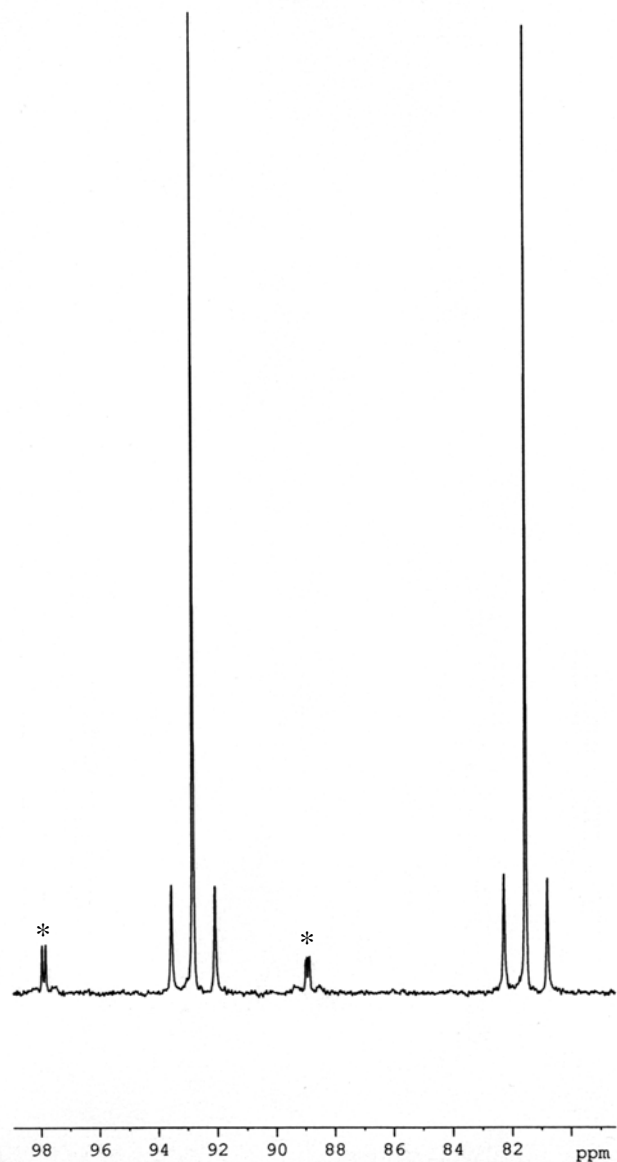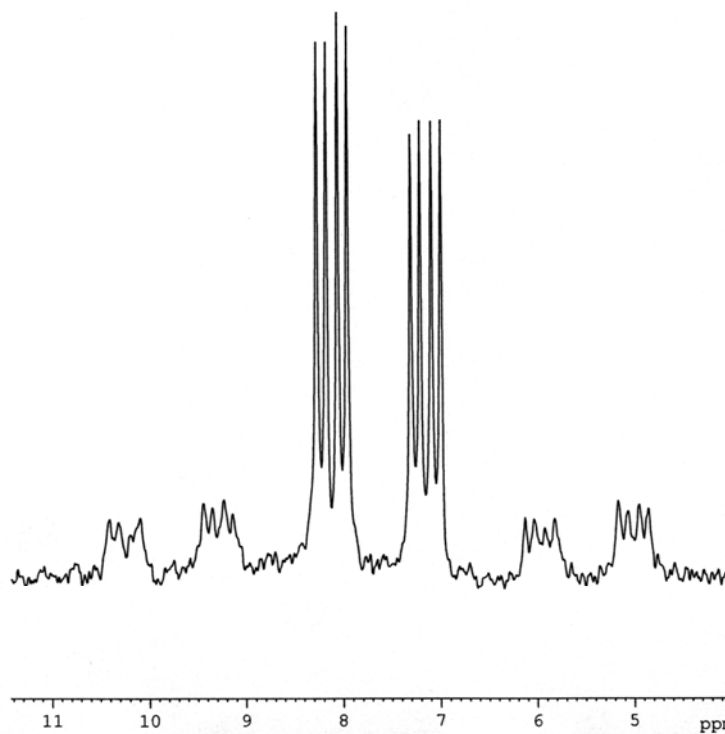

```
Current Data Parameters
NAME          90401jr1
EXPNO         4
PROCNO        1

F2 - Acquisition Parameters
Date_         20090401
Time_         15.10
INSTRUM       spect
PROBHD        5 mm BBO BB-1H
PULPROG       dept90
TD            32768
SOLVENT       CDC13
NS            37411
DS            0
SWH           25125.629 Hz
FIDRES        0.766773 Hz
AQ            0.6521332 sec
RG            32768
DW            19.900 usec
DE            29.00 usec
TE            296.9 K
CNST2         145.0000000
D1            1.00000000 sec
d2            0.00344828 sec
d12           0.00002000 sec
DELTA         0.00000993 sec
MCREST        0.00000000 sec
MCWRK         0.01500000 sec

===== CHANNEL f1 =====
NUC1          13C
P1            7.80 usec
p2            15.60 usec
PL1           -2.00 dB
SFO1          100.4546033 MHz

===== CHANNEL f2 =====
CPDPRG2       waltz16
NUC2          1H
P3            9.50 usec
p4            19.00 usec
PCPD2         80.00 usec
PL2           -2.00 dB
PL12          18.00 dB
SFO2          399.4572000 MHz

F2 - Processing parameters
SI            32768
SF            100.4429261 MHz
WDW           EM
SSB           0
LB            2.00 Hz
GB            0
PC            1.40

1D NMR plot parameters
CX            20.00 cm
F1P           15.822 ppm
F1            1589.17 Hz
F2P           1.877 ppm
F2            188.53 Hz
PPMCM         0.69723 ppm/c
HZCM          70.03214 Hz/cm
```

**<sup>31</sup>P NMR Spectrum (*d*<sub>8</sub>-THF) of *trans*-8 (asterisks denote 9a as a minor impurity)**

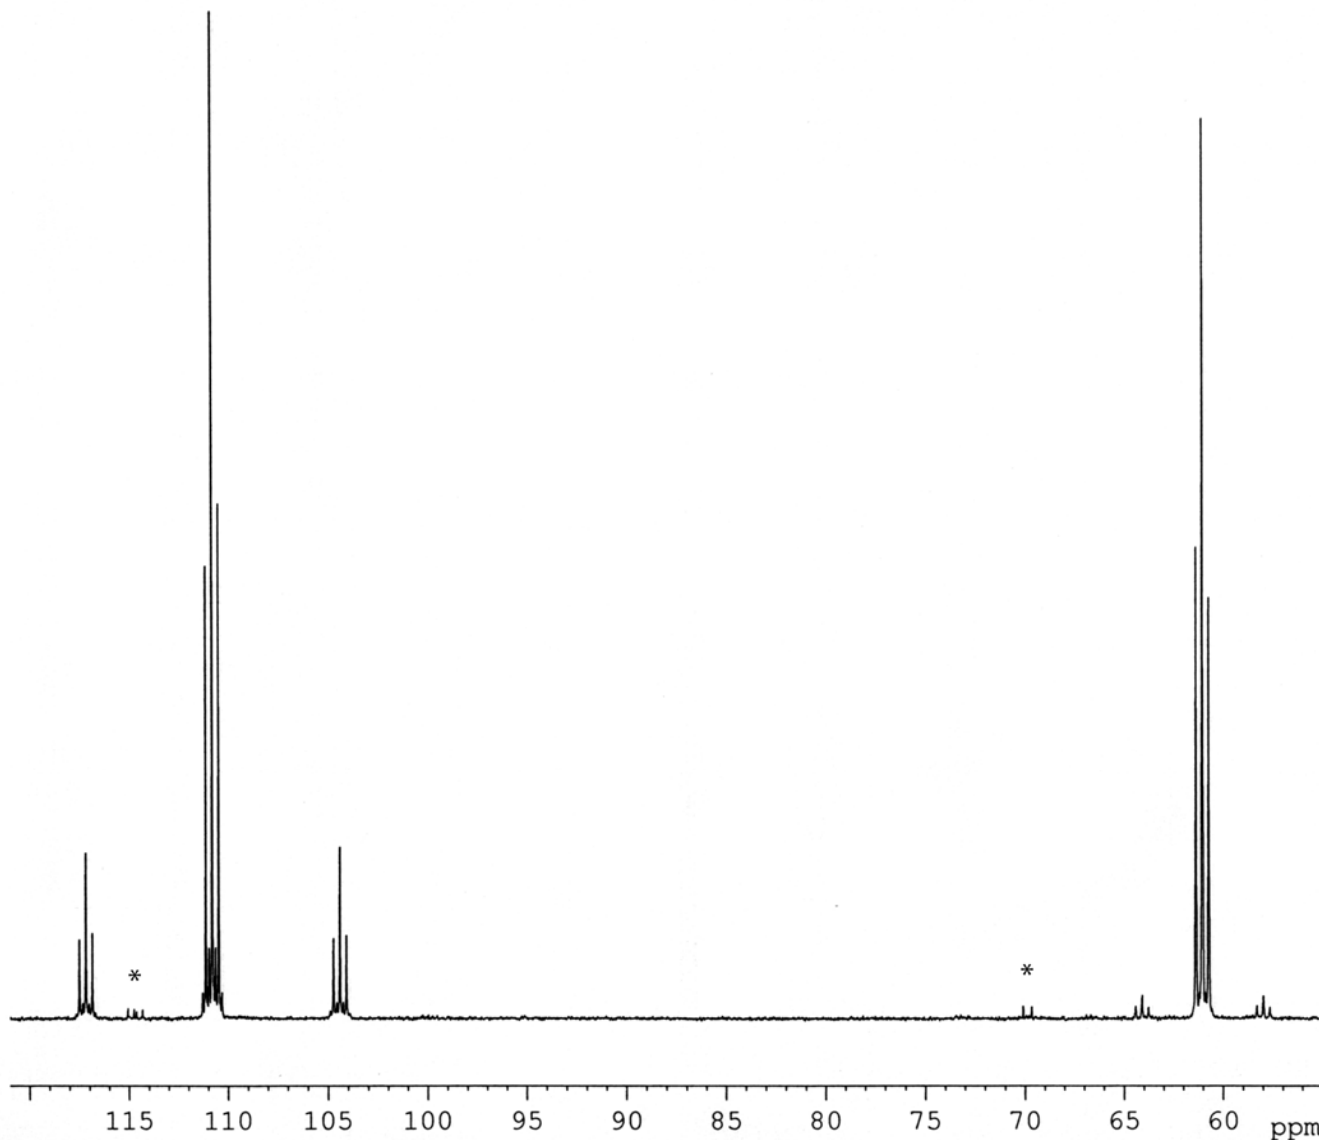

Current Data Parameters  
NAME 81003jr1  
EXPNO 2  
PROCNO 1

F2 - Acquisition Parameters  
Date 20081003  
Time 10.46  
INSTRUM spect  
PROBHD 5 mm BBO BB-1H  
PULPROG zgdc30  
TD 32768  
SOLVENT D2O  
NS 1007  
DS 0  
SWH 48661.801 Hz  
FIDRES 1.485040 Hz  
AQ 0.3367412 sec  
RG 8192  
DW 10.275 usec  
DE 14.68 usec  
TE 298.0 K  
D1 1.00000000 sec  
d11 0.03000000 sec  
MCREST 0.00000000 sec  
MCWRK 0.01500000 sec

===== CHANNEL f1 =====  
NUC1 31P  
P1 6.60 usec  
PL1 -2.00 dB  
SFO1 161.7102994 MHz

===== CHANNEL f2 =====  
CPDPRG2 waltz16  
NUC2 1H  
PCPD2 80.00 usec  
PL2 120.00 dB  
PL12 18.00 dB  
SFO2 399.4572000 MHz

F2 - Processing parameters  
SI 32768  
SF 161.7022045 MHz  
WDW EM  
SSB 0  
LB 1.00 Hz  
GB 0  
PC 1.40

1D NMR plot parameters  
CX 20.00 cm  
CY 7.99 cm  
F1P 130.000 ppm  
F1 21021.29 Hz  
F2P 20.000 ppm  
F2 3234.04 Hz  
PPMCM 5.50000 ppm/cm  
HZCM 889.36212 Hz/cm

**<sup>125</sup>Te NMR Spectrum (*d*<sub>8</sub>-THF) of *trans*-8**

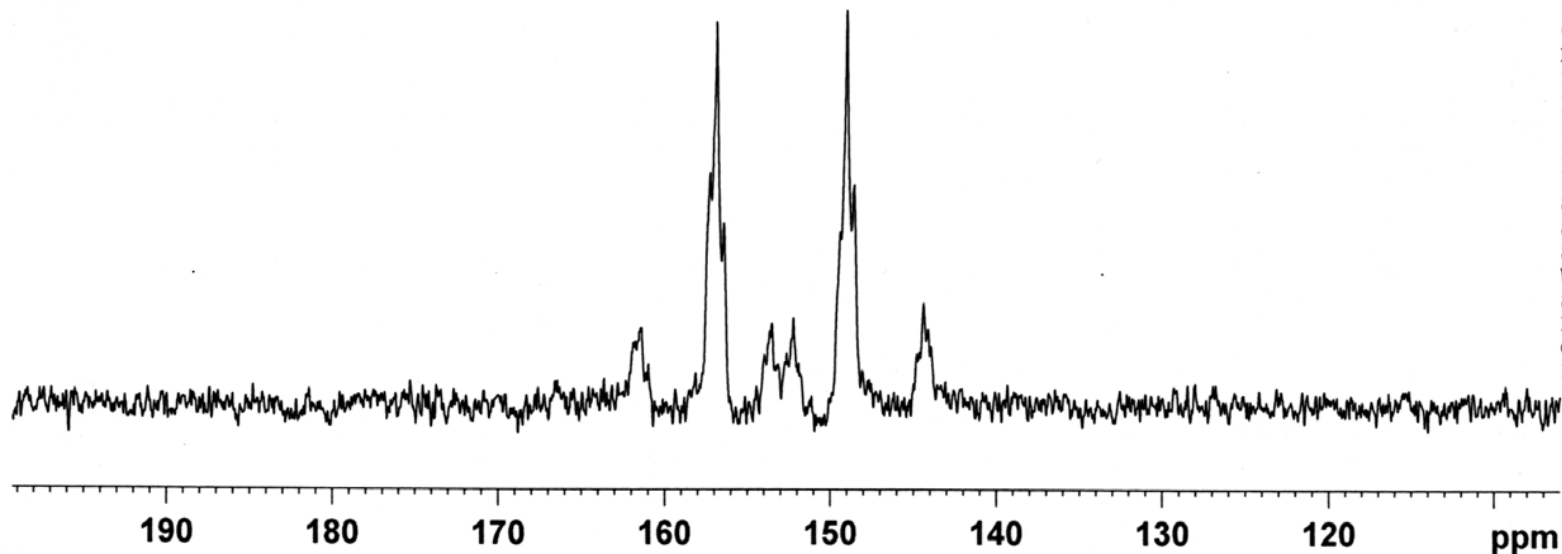

NAME 81216jr1  
EXPNO 3  
PROCNO 1  
Date\_ 20081216  
Time 19.12  
INSTRUM spect  
PROBHD 5 mm PABBO BB-  
PULPROG zgdc30  
TD 32768  
SOLVENT THF  
NS 35000  
DS 4  
SWH 75187.969 Hz  
FIDRES 2.294555 Hz  
AQ 0.2179572 sec  
RG 32768  
DW 6.650 usec  
DE 50.00 usec  
TE 298.2 K  
D1 1.00000000 sec  
D11 0.03000000 sec  
TDO 1

==== CHANNEL f1 =====  
NUC1 125Te  
P1 5.50 usec  
PL1 3.00 dB  
SFO1 126.2748044 MHz

==== CHANNEL f2 =====  
CPDPRG2 waltz16  
NUC2 1H  
PCPD2 80.00 usec  
PL2 0.00 dB  
PL12 15.00 dB  
PL2W 15.07131863 W  
PL12W 0.47659695 W  
SFO2 400.1816007 MHz  
SI 32768  
SF 126.2557224 MHz  
WDW EM  
SSB 0  
LB 8.00 Hz  
GB 0  
PC 1.40

**<sup>195</sup>Pt NMR Spectrum (*d*<sub>8</sub>-THF) of *trans*-8**

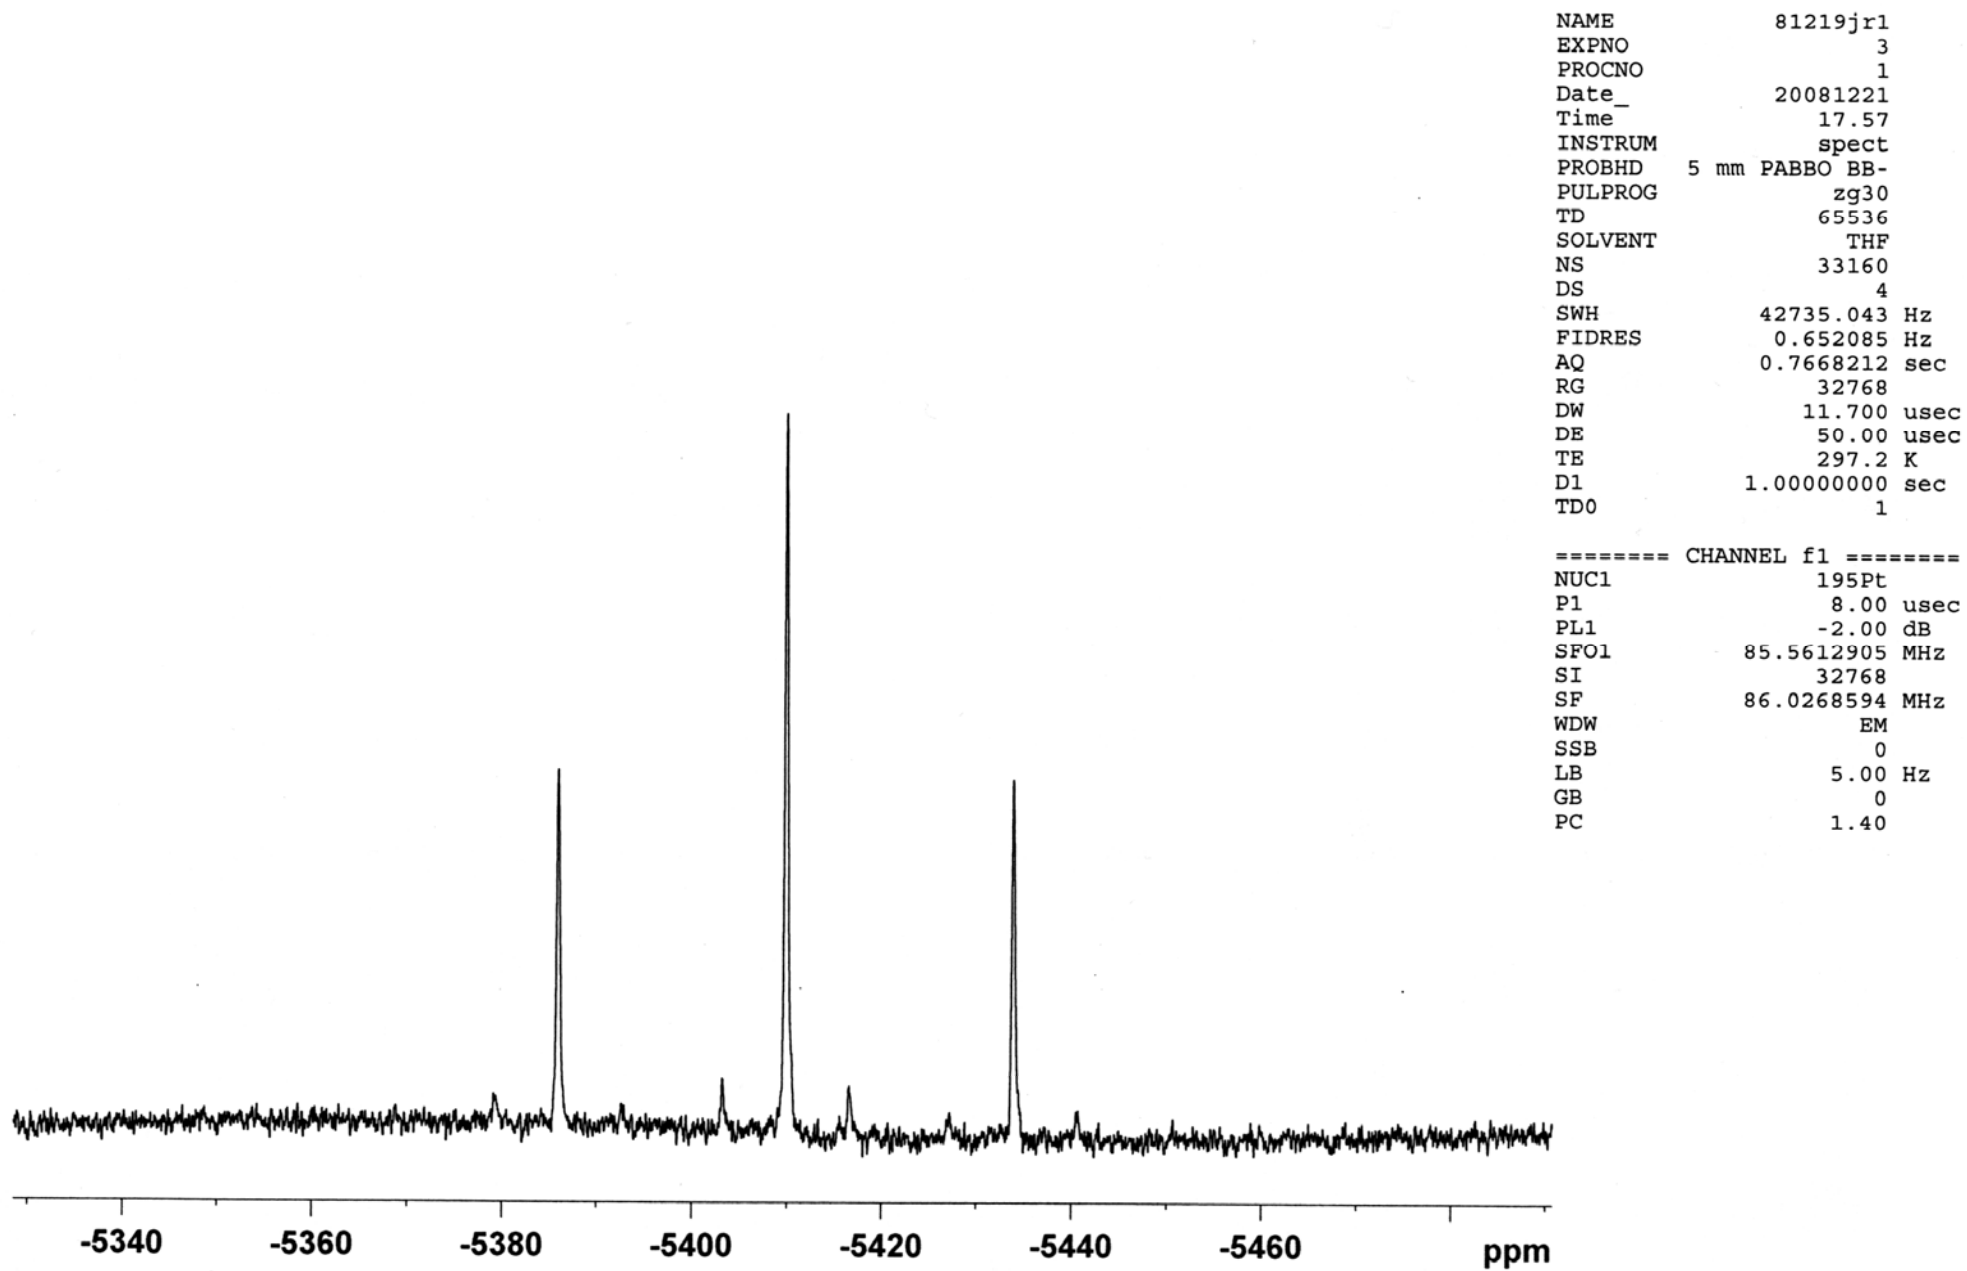

Supplement: b911490d.pdf [file b911490d.pdf]
